# Supplementary material for: Enhanced catalysis of [image] radical-to-polysulfide interconversion via increased sulfur vacancies in lithium–sulfur batteries
Source: Chem Sci. 2022 May 10;13(21):6224–32. doi: 10.1039/d2sc01353c (PMC9159087; doi:10.1039/d2sc01353c)
Supplement: SC-013-D2SC01353C-s001 [file SC-013-D2SC01353C-s001.pdf]

## Supporting information

### Enhanced Catalysis of $\text{LiS}_2^\bullet$ Radical-to-Polysulfide Interconversion via Increased Sulfur Vacancies in Lithium–Sulfur Batteries

Rui Xu, <sup>†a</sup> Hongan Tang, <sup>†a</sup> Yuanyuan Zhou, <sup>a</sup> Fangzheng Wang, <sup>a</sup> Hongrui Wang, <sup>a</sup> Minhua Shao, <sup>b</sup> Cunpu Li, <sup>\*a</sup> Zidong Wei<sup>\*a</sup>

<sup>†</sup>The State Key Laboratory of Power Transmission Equipment & System Security and New Technology, Chongqing Key Laboratory of Chemical Process for Clean Energy and Resource Utilization, School of Chemistry and Chemical Engineering, Chongqing University, Shazhengjie 174, Chongqing 400044, China.

<sup>‡</sup>Department of Chemical and Biological Engineering, The Hong Kong University of Science and Technology, Clear Water Bay, Kowloon, Hong Kong

Correspondence to: [lcp@cqu.edu.cn](mailto:lcp@cqu.edu.cn); [zdwei@cqu.edu.cn](mailto:zdwei@cqu.edu.cn)

<sup>§</sup> Rui Xu and Hongan Tang contributed equally to this paper.

### Further Discussion

To elucidate the kinetics difference of redox peaks, the cyclic voltammograms were studied further (**Fig. 5(a-c)**). The power-law relationships between peak current and the scan rates were analyzed based on the following equation:<sup>1, 2</sup>

$$i = av^b \quad (1)$$

***b*** is positively and correlate to the corresponding Li<sup>+</sup> diffusion, which can be determined from the slope of the plot of ***log i*** vs. ***log v***. The ***b***-values of the cathodic Peak 1 (high-order LiPSs to Li<sub>2</sub>S<sub>4</sub>) and Peak 2 (Li<sub>2</sub>S deposition) were calculated and listed in **Figure S11**. Along with the increasing of sulfur vacancies, it can be seen that the ***b***-values were 0.53, 0.58, and 0.60 at Peak1 for CMG-L, CMG-M, and CMG-H, respectively. This is consistent with the abundant active sites of CMG-H, which will easily covert element sulfur to Li<sub>2</sub>S<sub>4</sub>. Besides, CMG-H exhibited the highest ***b***-values at Peak 2, implying that the Li<sub>2</sub>S can effectively and uniformly deposit *via* Route II. The liquid-phase LiS<sub>3</sub><sup>\*</sup> will convert to the rapidly liquid-phase Li<sub>2</sub>S<sub>3</sub>, subsequently rapidly transforming the solid-phase Li<sub>2</sub>S<sub>2</sub> and Li<sub>2</sub>S *via* the reduction reaction.

For confirming the improvement of the redox kinetics, the Li<sup>+</sup> ion diffusion properties were evaluated by Randles–Sevcik equation:

$$i_p = (2.69 \times 10^5)n^{1.5}A D_{Li^+}^{0.5} v^{0.5} C_{Li^+} \quad (2)$$

where ***i<sub>p</sub>*** is the peak current density, ***n*** is the charge transfer number, ***A*** is the area of electrode. ***D<sub>Li<sup>+</sup></sub><sup>0.5</sup>*** is the Li<sup>+</sup> ion diffusion coefficient, ***v<sup>0.5</sup>*** is the scan rate, and ***C<sub>Li<sup>+</sup></sub>*** is the concentration of Li<sup>+</sup> ions in the cathode. Therefore, the value of ***i<sub>p</sub>/v<sup>0.5</sup>*** can represent the Li<sup>+</sup> diffusion rate because ***n***, ***A***, and ***C<sub>Li<sup>+</sup></sub>*** are unchanged. Li<sup>+</sup> ion diffusion coefficient was determined by both the conductivity and reaction kinetics with S-species.<sup>3</sup> As shown in **Figure S12**, CMG-H exhibits highest ***i<sub>p</sub>/v<sup>0.5</sup>*** in both the conversion of Peak 1 and Peak 2. The reaction kinetics were accelerated for the conversions of Peak 1 and Peak 2, especially Li<sub>2</sub>S deposition. It was also verified that the solid-phase Li<sub>2</sub>S were uniformly deposited from **Figure S12**, attributing to the faster Li<sup>+</sup> ion diffusion. Thus, with the increase of sulfur vacancies, active LiS<sub>3</sub><sup>\*</sup> will rapidly convert to Li<sub>2</sub>S<sub>3</sub>, following transform to solid-phase Li<sub>2</sub>S<sub>2</sub> and Li<sub>2</sub>S. High Li<sup>+</sup> conductivity and fastest reaction kinetics endow the CMG-H the best battery performance.

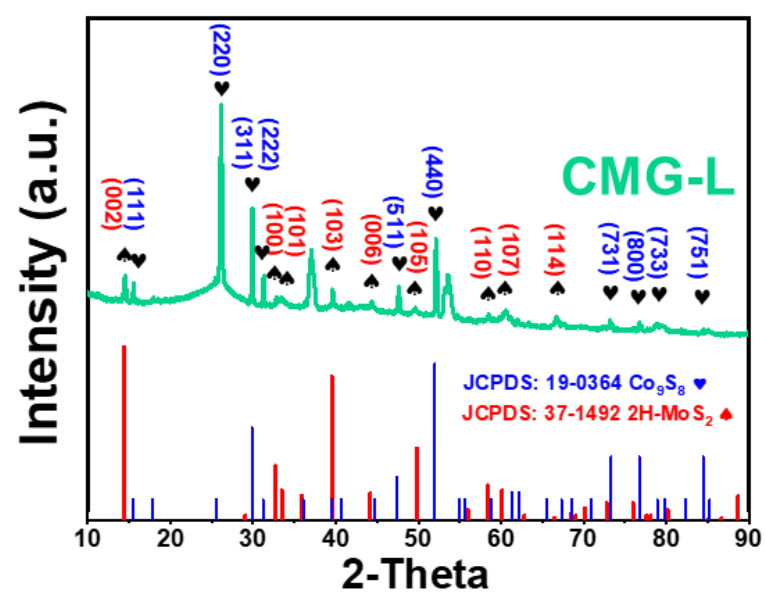

Figure S1. XRD spectrum of CMG-L.

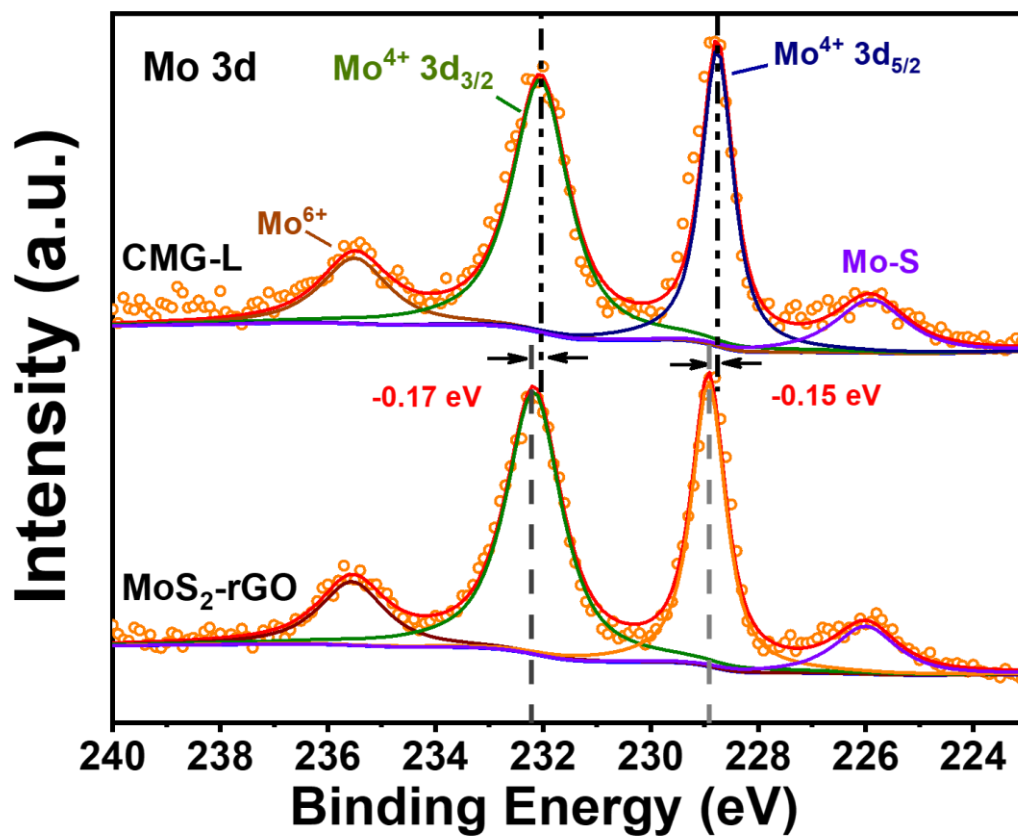

Figure S2. XPS spectrum of the CMG-L and MoS<sub>2</sub>-rGO.

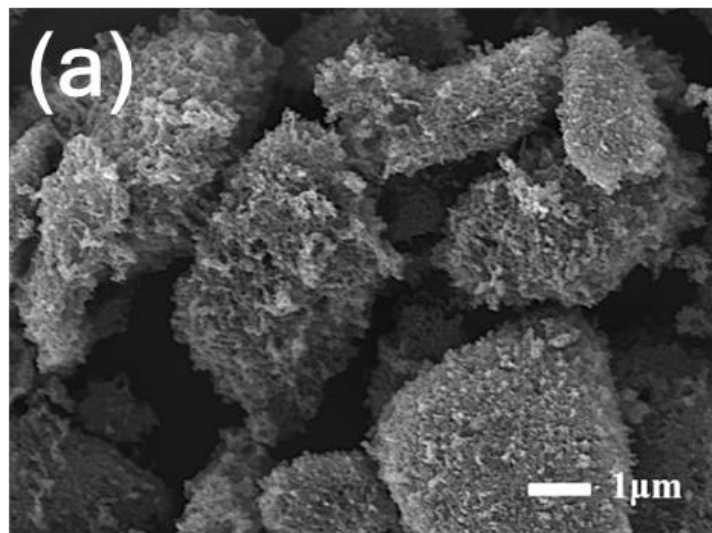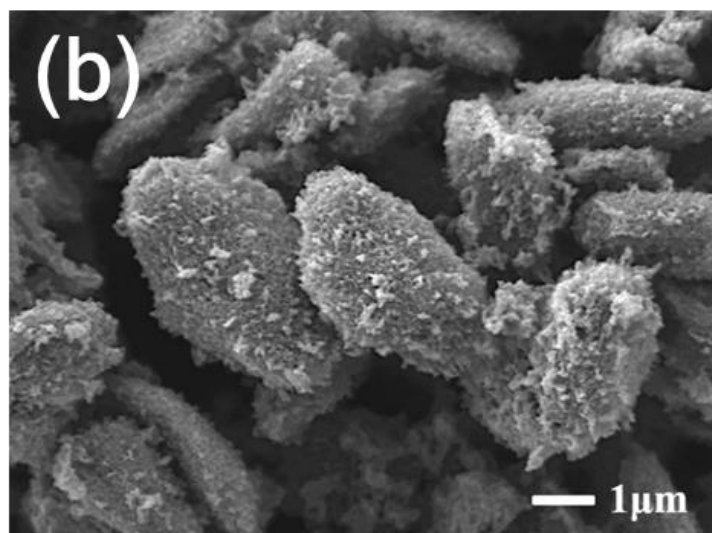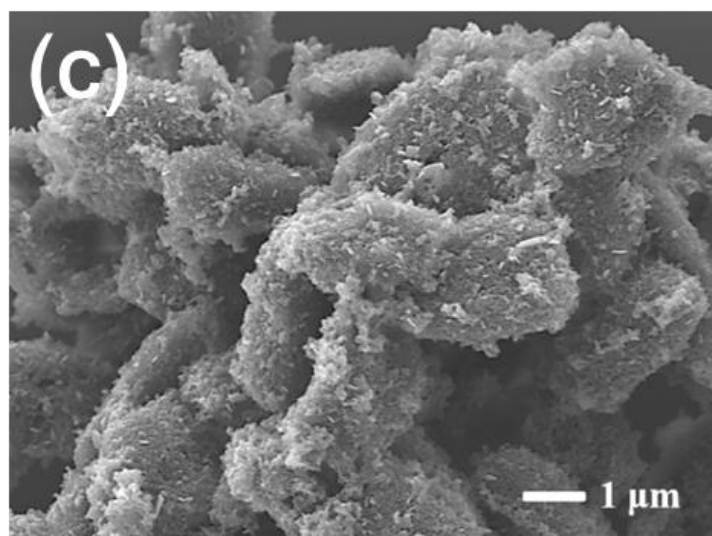

**Figure S3.** The SEM images of (a) CMG-L (b) CMG-M and (c) CMG-H.

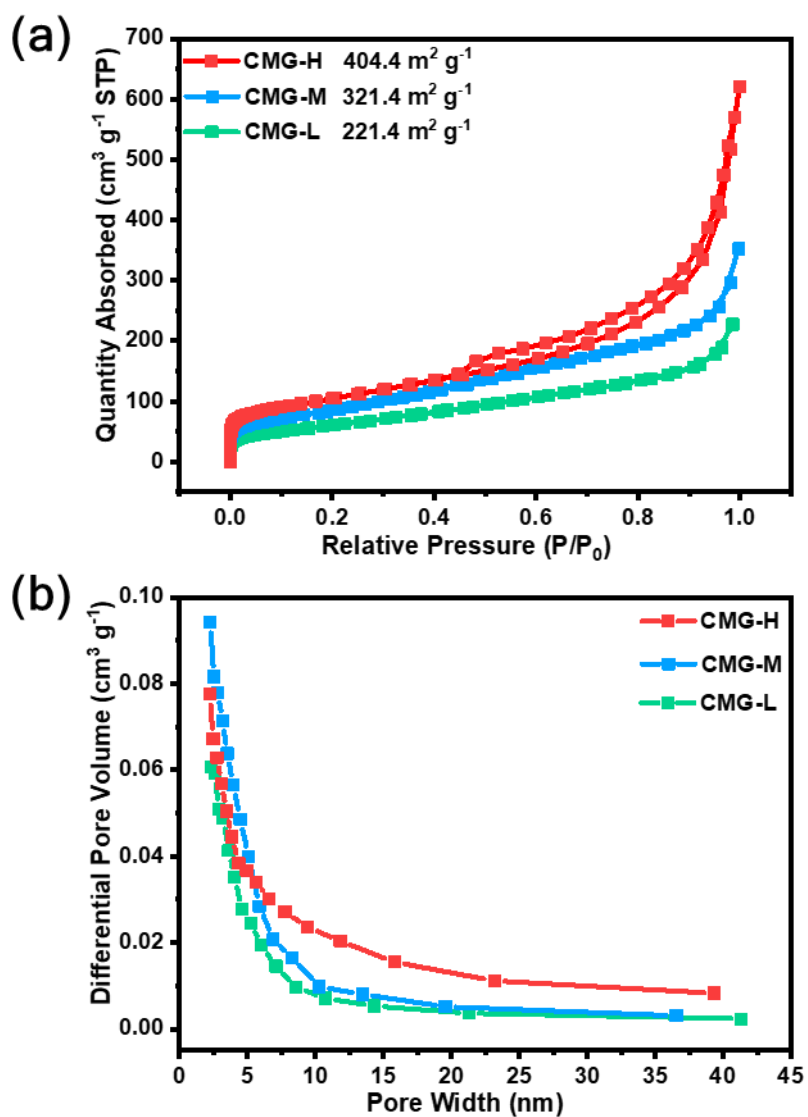

**Figure S4.** The  $\text{N}_2$  adsorption-desorption isotherms (a) and pore distribution (b) of CMG-L, CMG-M and CMG-H.

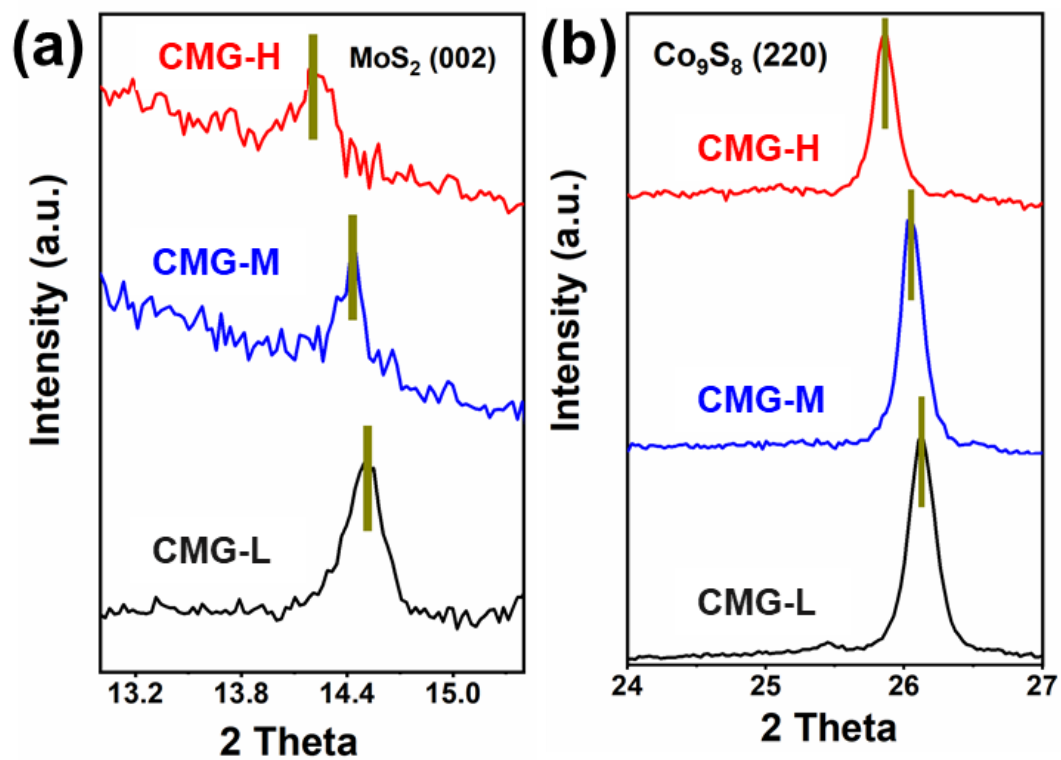

Figure S5. The expanded view of XRD patterns in  $2\theta$  regions of CMG-L, CMG-M and CMG-H.

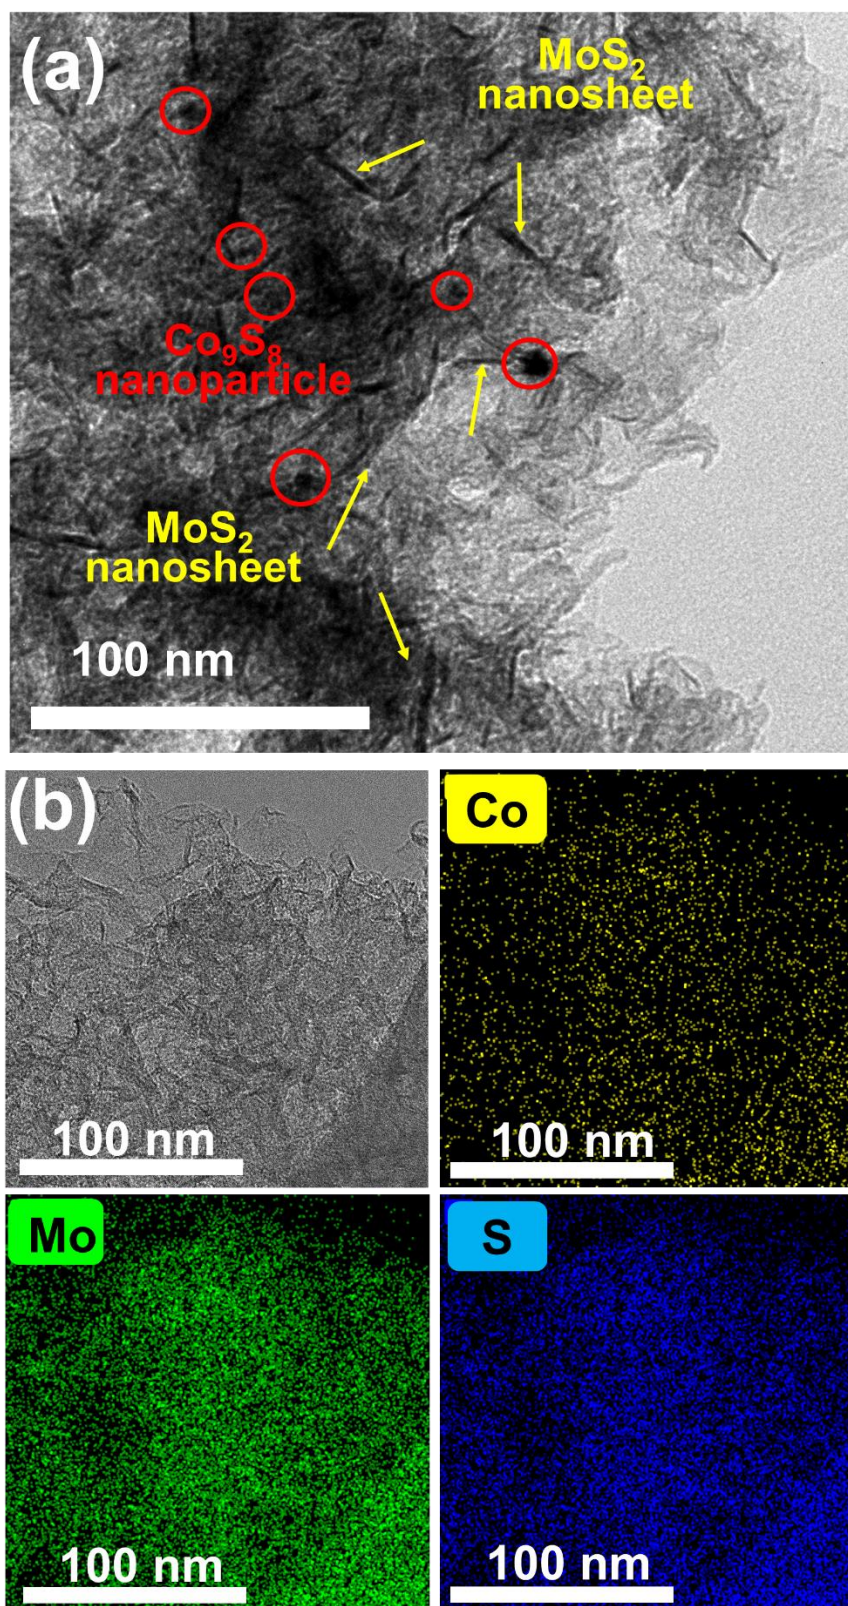

**Figure S6.** (a) TEM images and (b) elemental mappings images of CMG-H.

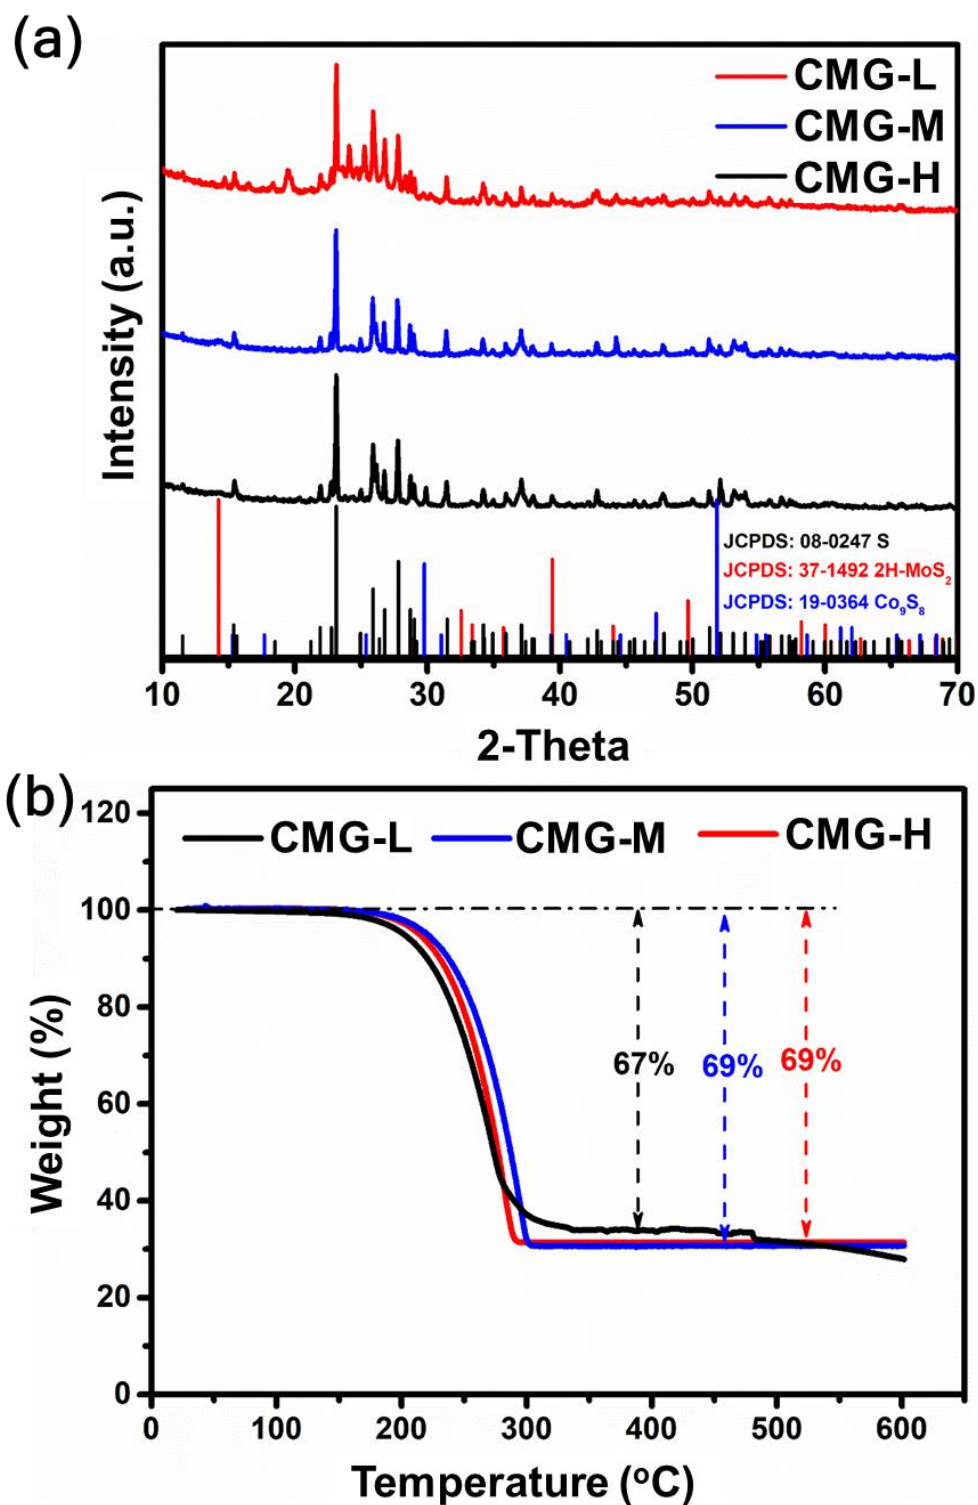

Figure S7. XRD patterns (a) and TG curves (b) of S@CMG-L, S@CMG-M and S@CMG-H.

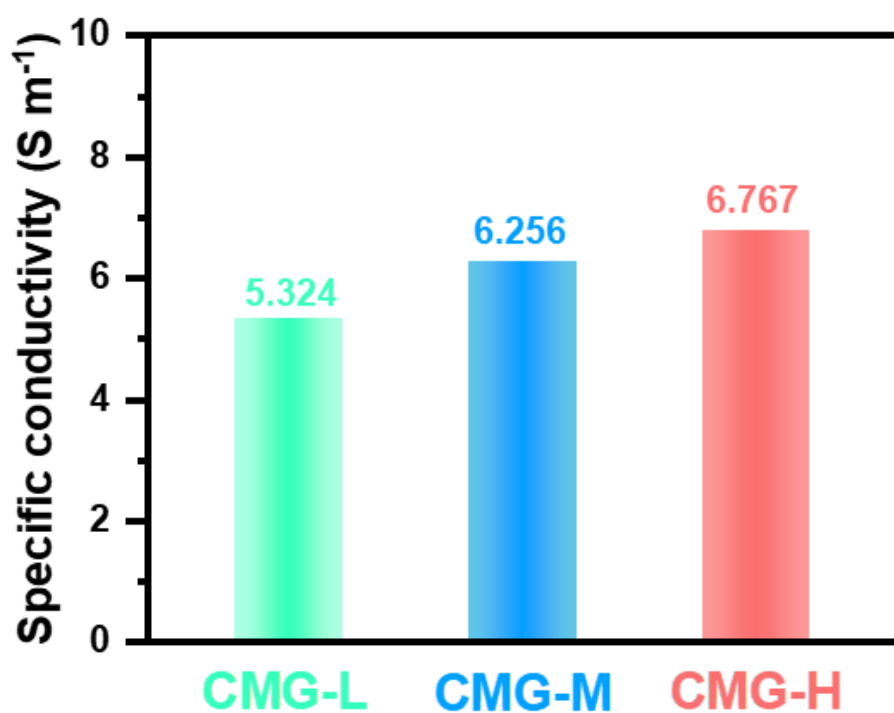

Figure S8. The specific conductivity of CMG materials with different sulfur vacancy.

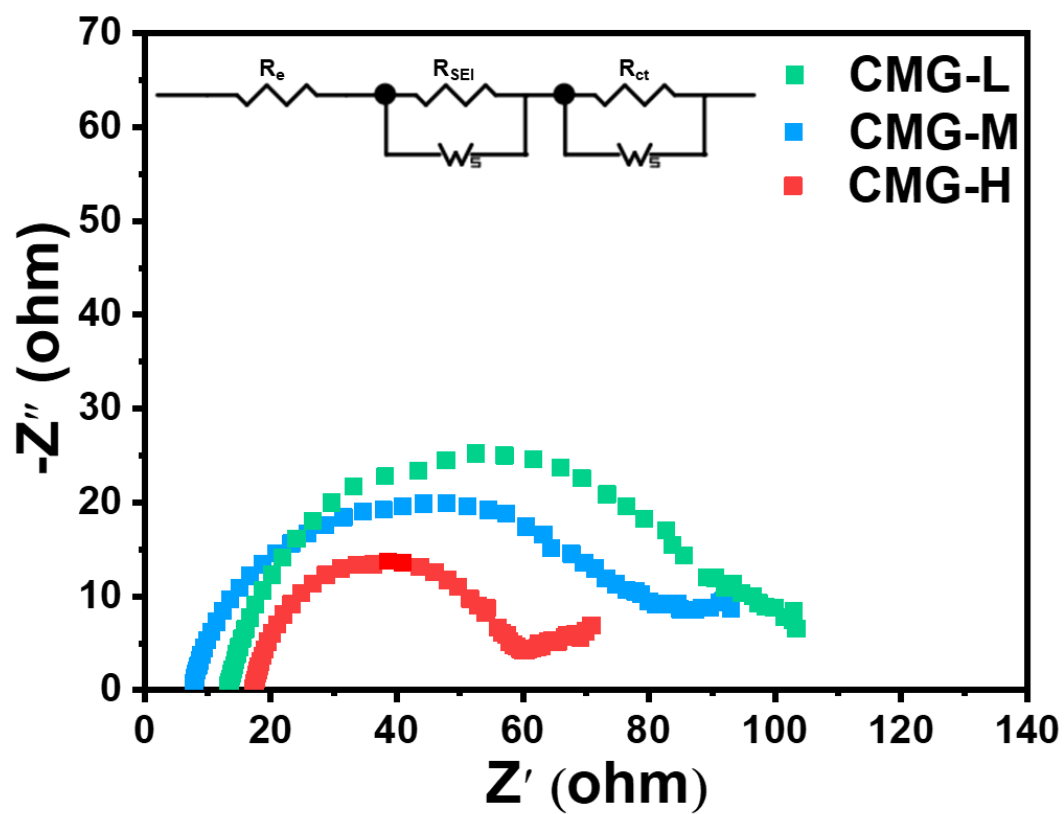

**Figure S9.** Electrochemical impedance spectra of the coin cells after activation by the galvanostatic charge-discharge test at 0.2 C.

### The electron transfer ratio (high-order LiPSs conversions and Li<sub>2</sub>S deposition) calculation

The **NTR** can be calculated *via* CV curves. Firstly, we should define the baseline for cathodic peaks of CV curves. Then, the integral area ( $A_t$ ) of cathodic peaks (peak 2 and peak 1) can be calculated *via* integration between Peak line and baseline. Moreover, the amount of electron transfer per gram ( $C_e$ ) was achieved *via*  $A_t$  (A·V) divided by scan rate ( $\nu$ , V·s<sup>-1</sup>), excluding the scan rate influence. Finally, the **NTR** can be calculated, which reveals the relationship between the high-order LiPSs conversions and Li<sub>2</sub>S deposition.

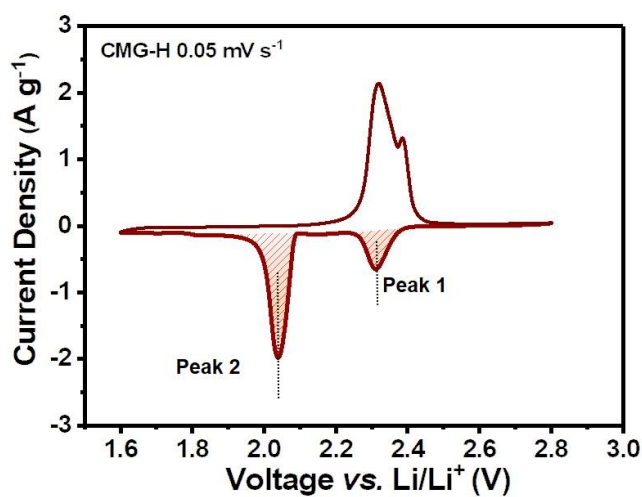

**Figure S10.** The calculation of integration areas on cathodic peaks.

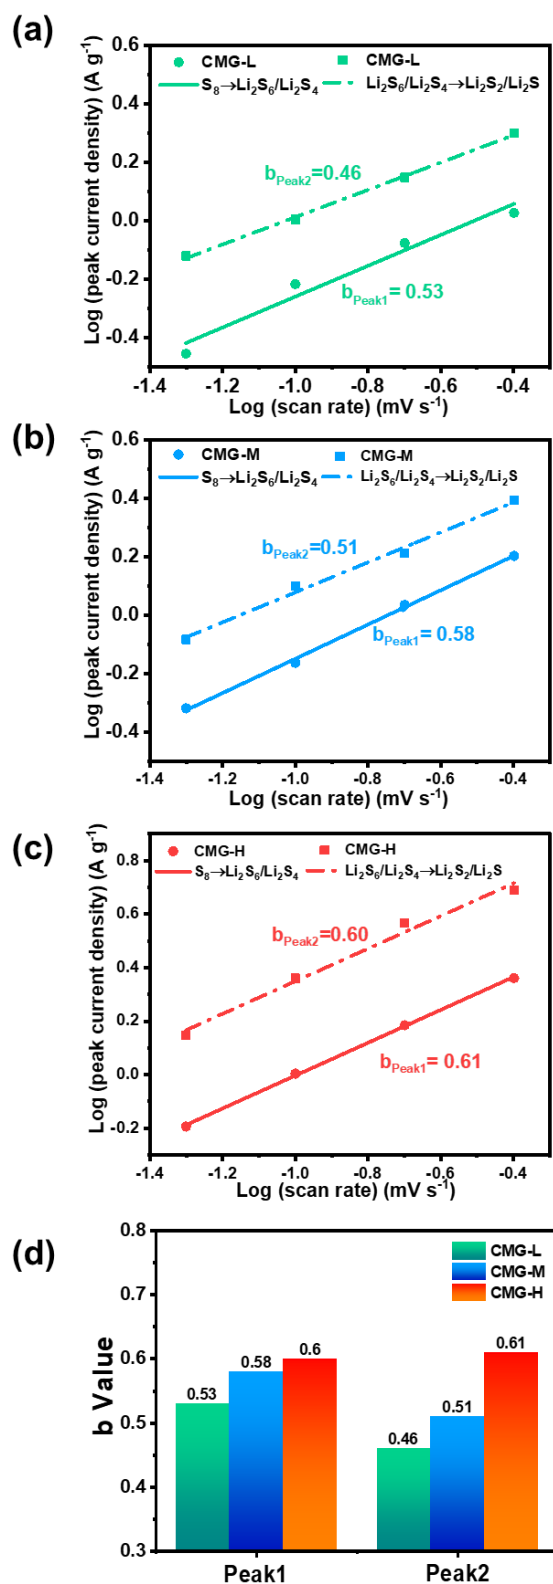

**Figure S11.** Plots of log(current) vs. log(scan rate) in Peak 1, Peak 2 for (a) CMG-L, (b) CMG-M., (c) CMG-H; (d) the b values of CMG-L, CMG-M and CMG-H in Peak 1, Peak 2.

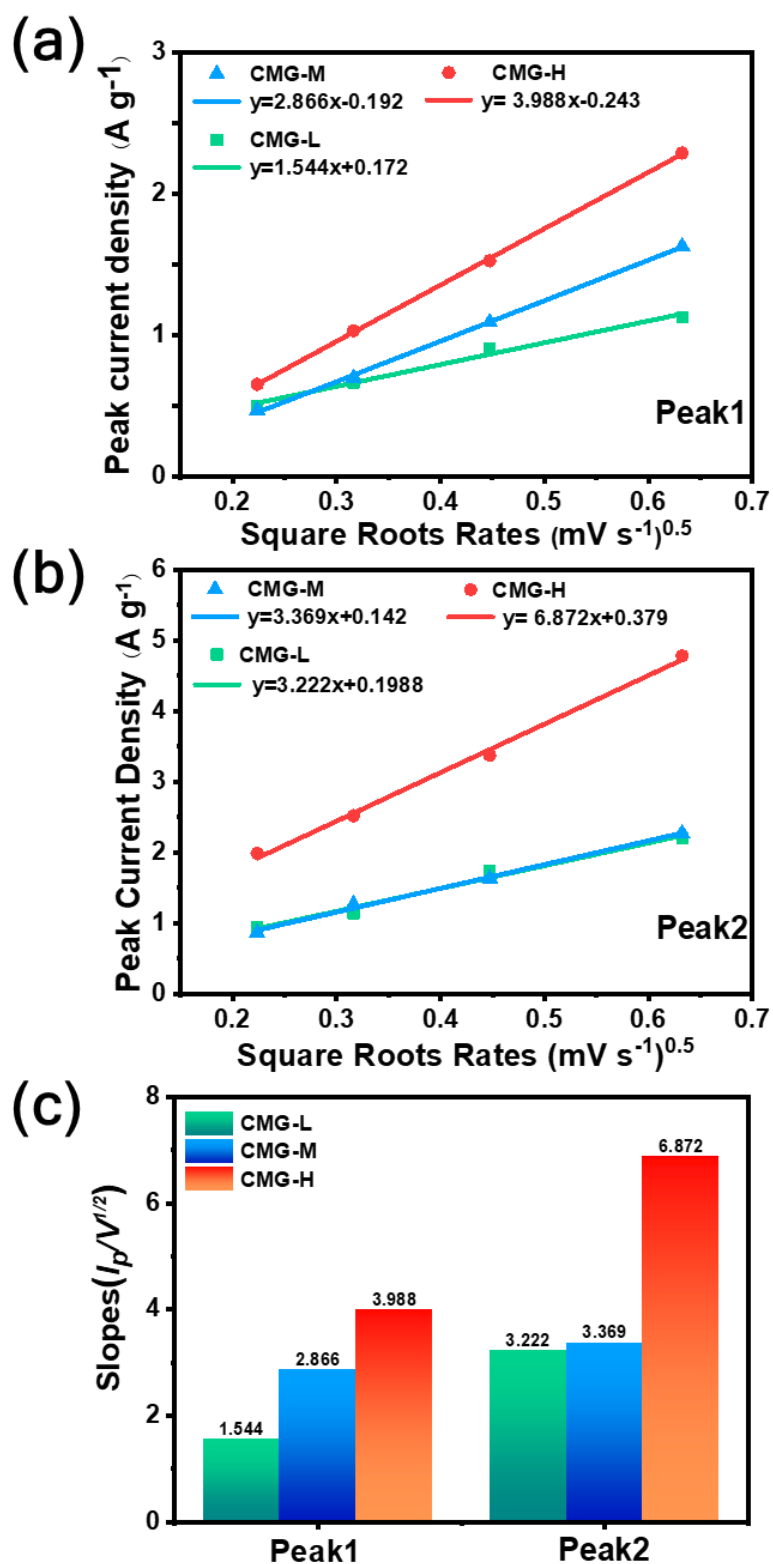

**Figure S12.** Plots of CV peak current density vs the square root of the scan rates for (a) Peak 1 and (b) Peak 2; (c) the slopes ( $i_p/v^{0.5}$ ) values of CMG-L, CMG-M and CMG-H.

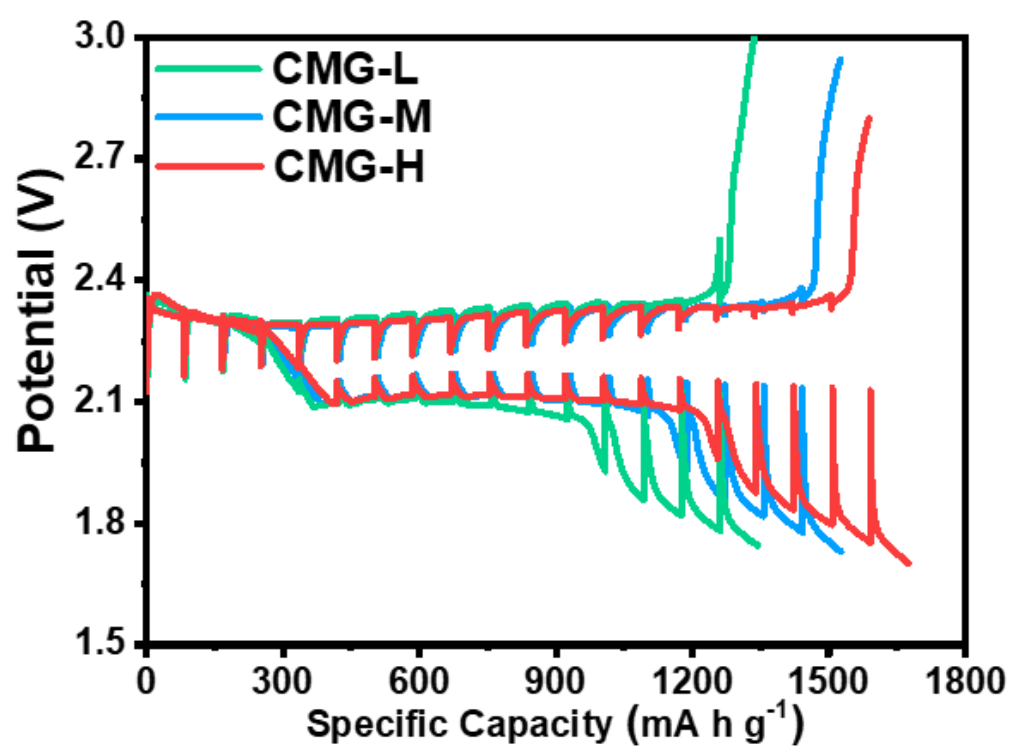

**Figure S13.** The potential response curves of the three electrodes during GITT measurement.

**Table S1.** The variety of sulfur defect concentration analyzed by XPS.

| Sample | Co-Mo-S (atom ratio) | Co <sub>9</sub> S <sub>8</sub> /MoS <sub>2</sub> (stoichiometric ratio)    | Sulfur loss ratio |
|--------|----------------------|----------------------------------------------------------------------------|-------------------|
| CMG-L  | 0.79-1.09-2.9        | Co <sub>0.79</sub> S <sub>0.70</sub> /Mo <sub>1.09</sub> S <sub>2.18</sub> | 0.12              |
| CMG-M  | 0.52-0.99-2.35       | Co <sub>0.52</sub> S <sub>0.46</sub> /Mo <sub>0.99</sub> S <sub>1.98</sub> | -0.09             |
| CMG-H  | 0.51-0.86-1.66       | Co <sub>0.51</sub> S <sub>0.45</sub> /Mo <sub>0.86</sub> S <sub>1.72</sub> | -0.51             |

**Table S2.** The equivalent circuit and fitting resistance of symmetric batteries.

| Full cell | $R_e$ | $R_{SEI}$ | $R_{ct}$ | Equivalent circuit |
|-----------|-------|-----------|----------|--------------------|
| CMG-L     | 13.19 | 40.54     | 61.02    |                    |
| CMG-M     | 7.43  | 36.65     | 41.09    |                    |
| CMG-H     | 15.59 | 27.58     | 30.16    |                    |

**Table S3.** The absolute values of the integration areas (peak 2 and peak 1) and NTR with different scan rates.

| Sample | Scan rates | Peak1                  | Peak2                  | NTR (peak2 vs. peak1) |
|--------|------------|------------------------|------------------------|-----------------------|
|        | (mV/s)     | (A·V·g <sup>-1</sup> ) | (A·V·g <sup>-1</sup> ) |                       |
| CMG-L  | 0.05       | 0.02256                | 0.06246                | 2.78                  |
|        | 0.1        | 0.05401                | 0.14182                | 2.63                  |
|        | 0.2        | 0.07913                | 0.19634                | 2.48                  |
|        | 0.4        | 0.12915                | 0.31063                | 2.40                  |
| CMG-M  | 0.05       | 0.02724                | 0.07996                | 2.93                  |
|        | 0.1        | 0.04566                | 0.12438                | 2.72                  |
|        | 0.2        | 0.08488                | 0.21956                | 2.58                  |
|        | 0.4        | 0.15109                | 0.37987                | 2.51                  |
| CMG-H  | 0.05       | 0.03631                | 0.10746                | 2.96                  |
|        | 0.1        | 0.06338                | 0.18696                | 2.95                  |
|        | 0.2        | 0.11984                | 0.34812                | 2.91                  |
|        | 0.4        | 0.20008                | 0.57968                | 2.90                  |

## References

- 1 W. G. Lim, C. Jo, A. Cho, J. Hwang, S. Kim, J. W. Han and J. Lee, *Adv. Mater.*, 2019, **31**, e1806547.
- 2 L. Xu, H. Zhao, M. Sun, B. Huang, J. Wang, J. Xia, N. Li, D. Yin, M. Luo, F. Luo, Y. Du and C. Yan, *Angew. Chem., Int. Ed*, 2019, **58**, 11491-11496.
- 3 Y. Tao, Y. Wei, Y. Liu, J. Wang, W. Qiao, L. Ling and D. Long, *Energy Environ. Sci.*, 2016, **9**, 3230-3239.
